# Supplementary material
Source: PubMed Central journal article supplement (PMC5046821)

## Holo-structure and steady state kinetics of the thiazoliny l imine reductases for siderophore biosynthesis

Kathleen M. Meneely, Trey A. Ronnebaum, Andrew P. Riley, Thomas E. Prisinzano, and Audrey L. Lamb

**Supplemental Figure 1:** Simulated annealing ( $2F_o-F_c$ ) omit map contoured at  $1.5\sigma$  (grey cages) carved at  $1.1 \text{ \AA}$  showing the density for NADP<sup>+</sup> (green sticks) and HPTT-COOH (pale cyan sticks). Upper, monomer A. Lower, monomer B. Note the two conformations of the nicotinamide in monomer B.

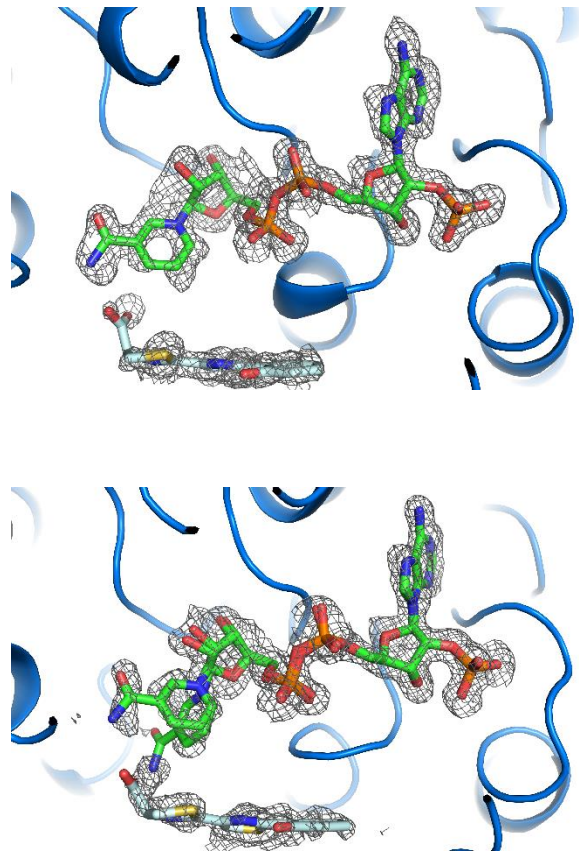

Supplement: NIHMS818825-supplement-supplement.pdf [file NIHMS818825-supplement-supplement.pdf]
